# Supplementary material for: Impaired Gut-Liver-Brain Axis in Patients with Cirrhosis
Source: PubMed Central journal article supplement (PMC4880966; doi:10.1038/srep26800), 2016-05-26

## **Impaired Gut-Liver-Brain Axis in Patients with Cirrhosis**

Vishwadeep Ahluwalia<sup>1</sup>, Naga S Betrapally<sup>2</sup>, Phillip B Hylemon<sup>3</sup>, Melanie B White<sup>1</sup>, Patrick M Gillevet<sup>2</sup>, Ariel B Unser<sup>1</sup>, Andrew Fagan<sup>1</sup>, Kalyani Daita<sup>1</sup>, Douglas M Heuman<sup>1</sup>, Huiping Zhou<sup>3</sup>, Masoumeh Sikaroodi<sup>2</sup>, Jasmohan S Bajaj<sup>1</sup>

<sup>1</sup>Gastroenterology, Hepatology and Nutrition, <sup>3</sup>Microbiology and Immunology, Virginia Commonwealth University and McGuire VA Medical Center, Richmond, Virginia <sup>2</sup>Microbiome Analysis Center, George Mason University, Manassas, Virginia

## Supplementary figure legends

Figure S1: PiCRUST analysis of predicted bacterial functions.

S1A: Human stool analysis of controls vs. cirrhotics. Red=cirrhosis, Green=controls.

This shows a significantly increased predicted bacterial functions related to endotoxin and endotoxin protein synthesis as well as aromatic amino acid metabolism in cirrhotic stool.

S1b: Human stool analysis of cirrhotic patients. Red=hepatic encephalopathy, Green=no hepatic encephalopathy. There was a significantly higher aromatic amino acid metabolism-related predicted function in stool microbiota of patients with hepatic encephalopathy

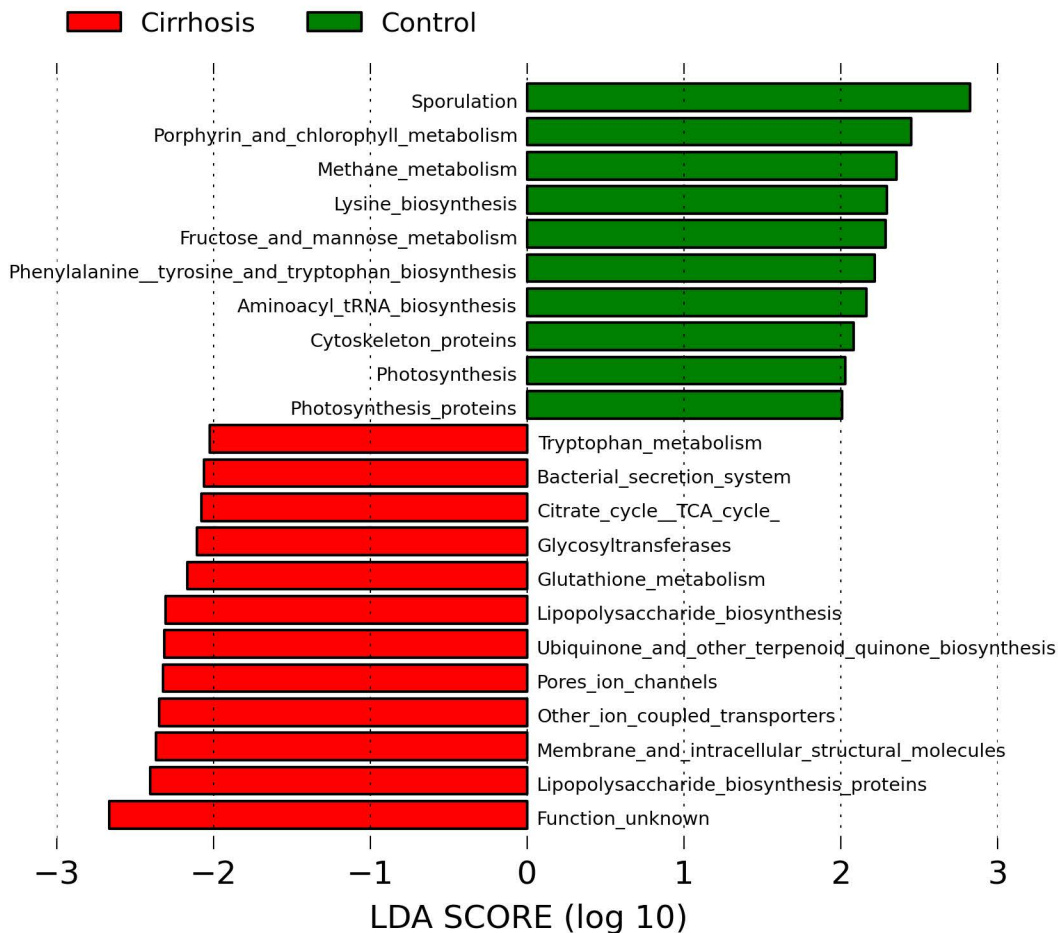

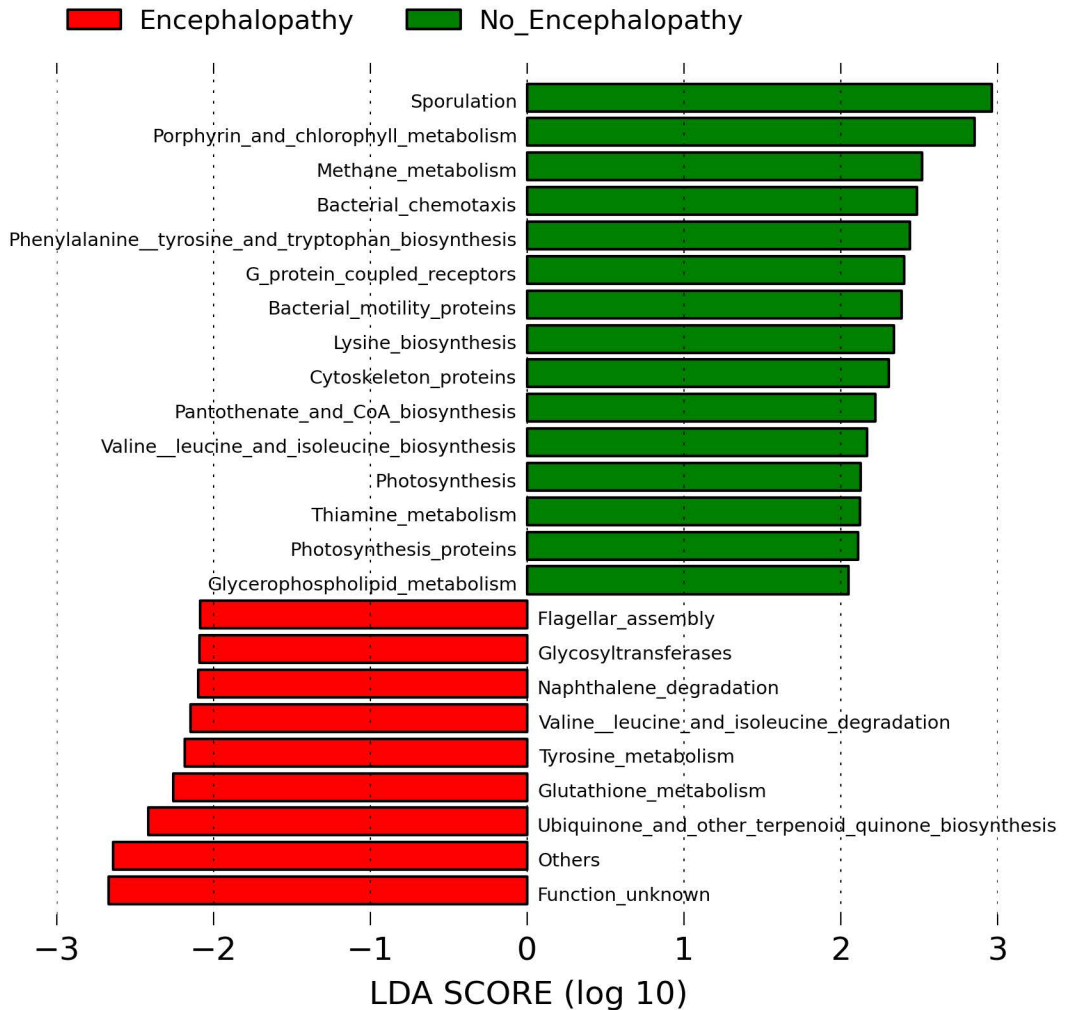

Supplement: srep26800-s1.pdf [file srep26800-s1.pdf]
